# Supplementary material for: Missense BICD2 variants in fetuses with congenital arthrogryposis and pterygia
Source: PubMed Central journal article supplement (PMC11345410; doi:10.1038/s41439-024-00290-z), 2024-08-26
Supplement: 41439_2024_290_MOESM1_ESM.pdf [file 41439_2024_290_MOESM1_ESM.pdf]

## Case 1

| Gene   | Codon      | Protein      | SIFT | PolyPhen2<br>HVAR | CADD<br>score | jMorp  | Father | Mother | Proband | Zygosity        |
|--------|------------|--------------|------|-------------------|---------------|--------|--------|--------|---------|-----------------|
| BICD2  | c.2200A>G  | p.Lys734Glu  | D    | P                 | 29.5          | NA     | 0 0    | 0 0    | 0 1     | de novo hetero  |
| CNTRL  | c.6221C>A  | p.Ala2074Asp | T    | B                 | 21.4          | 0.0013 | 0 1    | 0 1    | 1 1     | homo            |
| NEB    | c.14411G>A | p.Arg4804His | T    | B                 | 22.5          | 0.0048 | 0 0    | 0 1    | 0 1     | compound hetero |
| NEB    | c.10303A>G | p.Met3435Val | T    | B                 | 23            | NA     | 0 1    | 0 0    | 0 1     | compound hetero |
| ZBBX   | c.1015C>T  | p.Pro339Ser  | D    | B                 | 22.8          | 0.0628 | 0 0    | 0 1    | 0 1     | compound hetero |
| ZBBX   | c.439C>T   | p.Leu147Phe  | T    | B                 | 22.5          | 0.0004 | 0 1    | 0 0    | 0 1     | compound hetero |
| PRRC2A | c.6016C>T  | p.Pro2006Ser | D    | P                 | 24.2          | 0.0035 | 0 0    | 0 1    | 0 1     | compound hetero |
| PRRC2A | c.6278C>G  | p.Thr2093Arg | D    | B                 | 22.8          | NA     | 0 1    | 0 0    | 0 1     | compound hetero |
| GPR179 | c.2650C>T  | p.Arg884Trp  | -    | B                 | 20.6          | NA     | 0 1    | 0 0    | 0 1     | compound hetero |
| GPR179 | c.1021G>A  | p.Gly341Arg  | -    | B                 | 20.7          | 0.0011 | 0 0    | 0 1    | 0 1     | compound hetero |
| LAMA5  | c.5624C>T  | p.Pro1875Leu | T    | D                 | 24.1          | NA     | 0 1    | 0 0    | 0 1     | compound hetero |
| LAMA5  | c.3055G>A  | p.Glu1019Lys | D    | P                 | 34            | NA     | 0 1    | 0 0    | 0 1     | compound hetero |
| LAMA5  | c.2665G>A  | p.Val889Met  | T    | P                 | 23.4          | 0.0292 | 0 0    | 0 1    | 0 1     | compound hetero |

## Case 2

| Gene    | Codon                 | Protein       | SIFT | PolyPhen2<br>HVAR | CADD<br>score | jMorp  | Father | Mother | Proband | Zygosity        |
|---------|-----------------------|---------------|------|-------------------|---------------|--------|--------|--------|---------|-----------------|
| FAM13A  | c.1288C>G             | p.Arg430Gly   | D    | D                 | 29.7          | NA     | 0 0    | 0 0    | 0 1     | de novo hetero  |
| BICD2   | c.2081G>A             | p.Arg694His   | D    | D                 | 34            | NA     | 0 0    | 0 0    | 0 1     | de novo hetero  |
| GIGYF2  | c.3611_3614insCGCAACA | -             | -    | -                 | -             | NA     | 1 2    | 1 2    | 1 1     | homo            |
| MEF2A   | c.1027_1032del        | p.343_344del  | -    | -                 | -             | NA     | 0 1    | 1 2    | 1 1     | homo            |
| CES1    | c.1087-2_1087-linsT   | -             | -    | -                 | -             | NA     | 0 1    | 0 1    | 1 1     | homo            |
| PLEKHH2 | c.1423G>A             | p.Ala475Thr   | T    | D                 | 23.7          | 0.0001 | 0 0    | 0 1    | 0 1     | compound hetero |
| PLEKHH2 | c.3958C>A             | p.Leu1320Ile  | T    | P                 | 24.6          | 0.0016 | 0 1    | 0 0    | 0 1     | compound hetero |
| TTN     | c.78325C>T            | p.Arg26109Cys | D    | P                 | 24.9          | 0.0023 | 0 0    | 0 1    | 0 1     | compound hetero |
| TTN     | c.71270A>G            | p.Asp23757Gly | D    | D                 | 20.4          | 0.0004 | 0 1    | 0 0    | 0 1     | compound hetero |
| TTN     | c.42359G>C            | p.Arg14120Pro | D    | D                 | 23.1          | NA     | 0 1    | 0 0    | 0 1     | compound hetero |
| TTN     | c.37897C>T            | p.Arg12633Cys | T    | D                 | 23.7          | 0.0092 | 0 1    | 0 0    | 0 1     | compound hetero |
| TTN     | c.9038A>T             | p.Glu3013Val  | T    | P                 | 23.4          | 0.0004 | 0 1    | 0 0    | 0 1     | compound hetero |
